# Supplementary material
Source: publisher figshare collection journal article supplement (https://acs.figshare.com/ndownloader/files/14794694)
Supplement: Supplementary file 1 [file 14794694]

## Supporting Information

# Formation of macrovoid-free PMDA-MDA polyimide membranes using a gelation-NIPs method for organic solvent nanofiltration

*Yuan Li, Jingjing Xue, Xu Zhang, Bing Cao and Pei Li\**

College of Materials Science and Engineering, Beijing University of Chemical Technology, Beijing, 100029, China.

**\*Corresponding author**, E-mail address: [lipei@mail.buct.edu.cn](mailto:lipei@mail.buct.edu.cn) (P. Li);

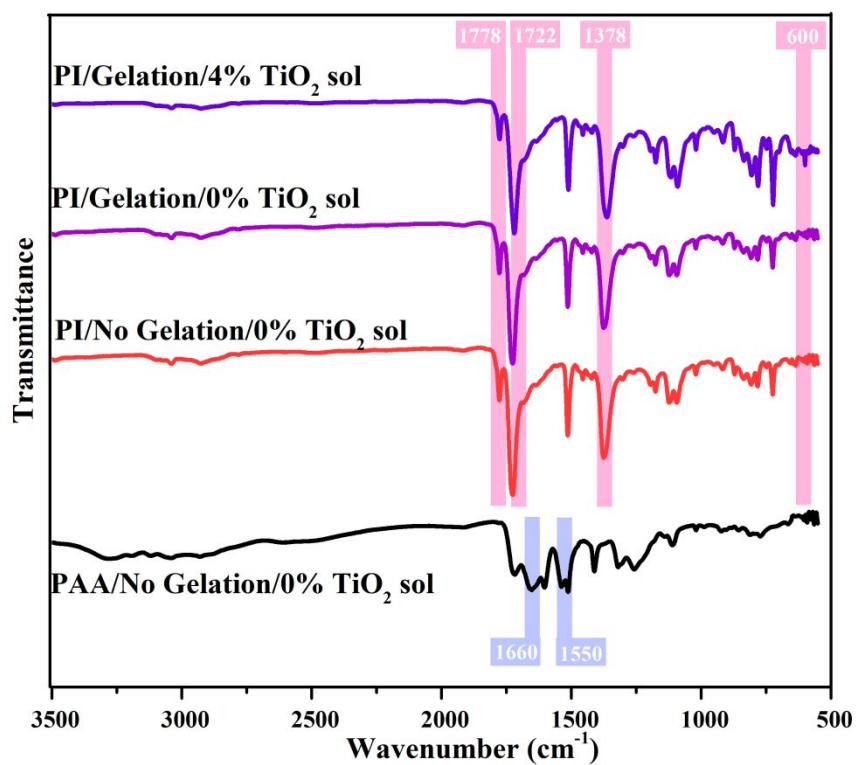

**Figure S1.** The FTIR spectra of PAA or PI membranes fabricated by different conditions.

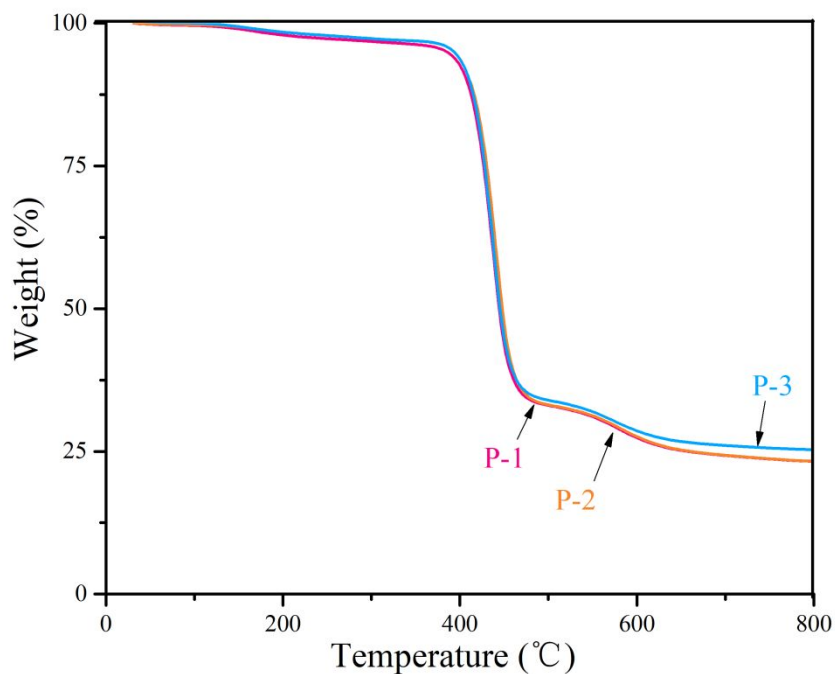

**Figure S2.** The TGA curves of PI membranes fabricated by different conditions.

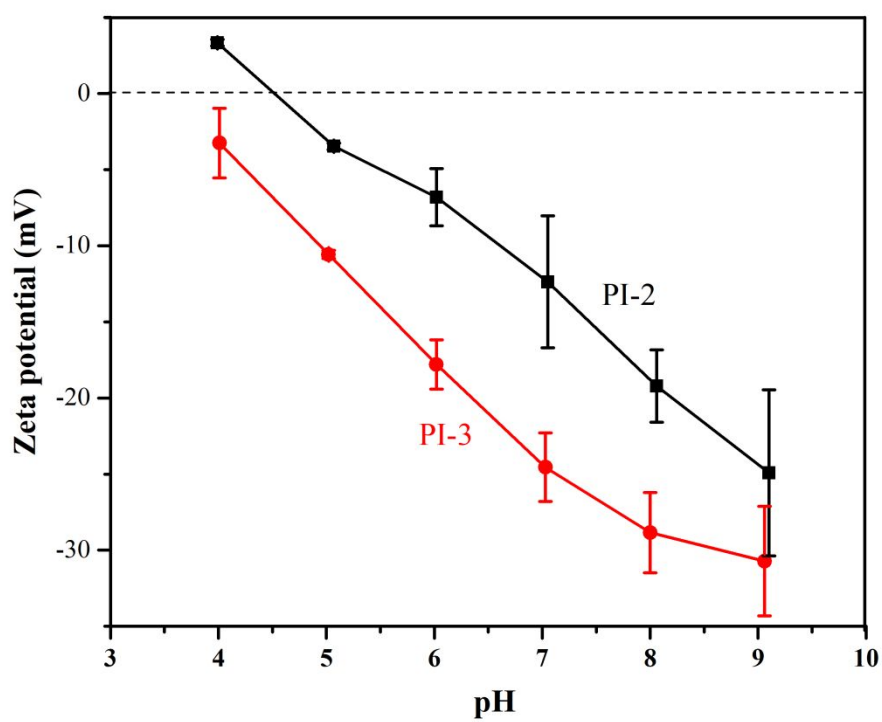

**Figure S3.** The zeta-potential of PMDA-MDA PI membranes with or without  $\text{TiO}_2$ .
